# Supplementary material
Source: ML conference proceedings conference paper supplement (https://openreview.net/forum?id=jYVY_piet7m)
Supplement: supplementary_material [file attachment]

## A AT TRANSFORMER IN SYNTHESIS EXPERIMENTS

Table 1: Performance of autoregressive models.

| AT Transformer              | En-Ro | En-De |
|-----------------------------|-------|-------|
| Vaswani et al. (2017)       | -     | 27.3  |
| Ghazvininejad et al. (2019) | 34.28 | 27.74 |
| Our implementation          | 34.25 | 27.45 |

In synthesis experiments, we trained all AT models with the standard Transformer-Base configuration: layer=6, dim=512, ffn=2048, head=8. The difference from Ghazvininejad et al. (2019) is that they trained the AT models for 300k steps, but we updated 50k/100k steps on En→Ro and En→De, respectively. Although fewer updates, as shown in Table 1, our AT models have comparable performance with theirs.

## B TRAINING ALGORITHM

---

### Algorithm 1 Training Algorithm for Hybrid-Regressive Translation

---

**Input:** Training data  $D$  including distillation targets, pretrained AT model  $M_{at}$ , chunk size  $k$ , mixed distillation rate  $p_{raw}$

**Output:** Hybrid-Regressive Translation model  $M_{hrt}$

```

1:  $M_{hrt} \leftarrow M_{at}$  ▷ finetune on pre-trained AT
2: for  $t$  in  $1, 2, \dots, T$  do
3:    $X = \{x_1, \dots, x_n\}, Y = \{y_1, \dots, y_n\}, Y' = \{y'_1, \dots, y'_n\} \leftarrow$  fetch a batch from  $D$ 
4:   for  $i$  in  $1, 2, \dots, n$  do
5:      $B_i = (X_i, Y_i^*) \leftarrow$  sampling  $Y_i^* \sim \{Y_i, Y'_i\}$  with  $P(Y_i) = p_{raw}$  ▷ mixed distillation
6:   end for
7:    $p_k \leftarrow$  get the chunk-aware proportion by Eq. 1 ▷ curriculum learning
8:    $B_{c=k}, B_{c=1} \leftarrow B_{: [n \times p_k]}, B_{[n \times p_k]}:$  ▷ split batch
9:    $B_{c=k}^{at}, B_{c=k}^{mp} \leftarrow$  construct {Skip-AT, Skip-MP} training samples based on  $B_{c=k}$ 
10:   $B_{c=1}^{at}, B_{c=1}^{mp} \leftarrow$  construct {AT, MP} training samples based on  $B_{c=1}$ 
11:  Optimize  $M_{hrt}$  using  $B_{c=k}^{at} \cup B_{c=1}^{at} \cup B_{c=k}^{mp} \cup B_{c=1}^{mp}$  ▷ joint training
12: end for
```

---

Algorithm 1 describes the process of training the HRT model. The HRT model is pre-initialized by a pre-trained AT model (Line 1). During training, the training batch  $B_i$  randomly select a raw target sentence  $Y_i$  or its distilled version  $Y'$  (Line 4-6). Then according to the linear schedule of  $p_k$ :

$$p_k = \left(\frac{t}{T}\right)^\lambda \quad (1)$$

where  $\lambda=1$ , we can divide  $B$  into two parts:  $B_{c=1}$  and  $B_{c=k}$ , where  $|B_{c=k}|/|B| = p_k$  (Line 7-8). Next, we construct four kinds of training samples based on corresponding batches:  $B_{c=k}^{at}$ ,  $B_{c=1}^{at}$ ,  $B_{c=k}^{mp}$  and  $B_{c=1}^{mp}$ . Finally, we collect all training samples together and accumulate their gradients to update the model parameters, which results in the batch size being twice that of standard training.

## C COMPUTATION COMPLEXITY

In Table 2, we summarized the comparison with Autoregressive Translation (AT), Iterative Refinement based Non-autoregressive Translation (IR-NAT) and Semi-Autoregressive Translation (SAT) Wang et al. (2018).

**AT.** Although both HRT and AT contain a slow autoregressive generation process, HRT’s length is  $k$  times shorter than AT. Considering that the computational complexity of self-attention is quadratic with its length, HRT can save more time in autoregressive mode.

Table 2: Compare hybrid-regressive translation (HRT) to autoregressive translation (AT), mask-predicted based non-autoregressive translation (MP), and semi-autoregressive translation (SAT).  $Q(i)$  denotes the computation cost in autoregressive mode when producing the  $i$ -th token (e.g., the prefix length is  $i - 1$ ).  $\hat{Q}_b(i)$  denotes the computation cost in non-autoregressive mode when producing  $i$  tokens by one shot with a beam size of  $b$ .  $I=4 \sim 10$ ,  $k$  is generally 2.

| Method | Steps   | Computing Cost                                      |
|--------|---------|-----------------------------------------------------|
| AT     | L       | $\sum_{i=1}^L Q(i)$                                 |
| IR-NAT | I       | $I \times \hat{Q}_{b=5}(L)$                         |
| SAT    | L/k     | $L/k \times (\hat{Q}_{b=5}(k) + \epsilon)$          |
| HRT    | L/k + 1 | $\sum_{i=1}^{L/k} Q(i \times k) + \hat{Q}_{b=1}(L)$ |

**IR-NAT.** Since Skip-AT provides a high-quality target context, HRT does not need to use large beam size and multiple iterations like IR-NAT. The experimental results also show that our light NAT can make up for the increased cost in Skip-AT, and can achieve stable acceleration regardless of the decoding batch size and running device.

**SAT.** SAT generates segments locally by non-autoregression, but it is still autoregressive between segments. We claim that SAT reduces the decoding steps by  $k$ , but each token’s calculation remains unchanged. In other words, in the time step  $i$ , there are  $i - 1$  tokens used for self-attention. By contrast, only  $i/k$  tokens are involved in our Skip-AT.

## REFERENCES

- Marjan Ghazvininejad, Omer Levy, Yinhan Liu, and Luke Zettlemoyer. Mask-predict: Parallel decoding of conditional masked language models. In *Proceedings of the 2019 Conference on Empirical Methods in Natural Language Processing and the 9th International Joint Conference on Natural Language Processing (EMNLP-IJCNLP)*, pp. 6111–6120, Hong Kong, China, November 2019. Association for Computational Linguistics. doi: 10.18653/v1/D19-1633. URL <https://www.aclweb.org/anthology/D19-1633>.
- Ashish Vaswani, Noam Shazeer, Niki Parmar, Jakob Uszkoreit, Llion Jones, Aidan N Gomez, Łukasz Kaiser, and Illia Polosukhin. Attention is all you need. In *Advances in Neural Information Processing Systems*, pp. 6000–6010, 2017.
- Chunqi Wang, Ji Zhang, and Haiqing Chen. Semi-autoregressive neural machine translation. In *Proceedings of the 2018 Conference on Empirical Methods in Natural Language Processing*, pp. 479–488, 2018.
